# Supplementary material for: HAP1, a new revolutionary cell model for gene editing using CRISPR-Cas9
Source: Front Cell Dev Biol. 2023 Mar 3;11:1111488. doi: 10.3389/fcell.2023.1111488 (PMC10020200; doi:10.3389/fcell.2023.1111488)
Supplement: Supplementary file 1 [file Table1.xlsx]

## Sheet: HAP1 CRISPR-Cas9
	Supplementary table 1
	FIELD	GENE STUDIED	CRISPR-CAS9	REFERENCES
	Oncology	BRCA1	HDR library SGE	Findlay et al., 2014 (DOI: 10.1038/nature13695)
			Saturation genome editing	Findlay et al., 2018 (DOI: 10.1038/s41586-018-0461-z)
		BRCA1, BRCA2	CRISPR-Cas9 cytosine base editors	Hanna et al., (DOI: 10.1016/j.cell.2021.01.012)
		BRCA1, BRCA2, POLE	Saturation genome editing	Billaud et al., 2021 (DOI: 10.1186/s13073-021-00976-x)
		kinases	custom-made KO	Robinson et al., 2019 (DOI: 10.1158/0008-5472.CAN-19-1364)
		genome-wide lethality screen	plasmid vector delivery	Gisler et al., 2020 (DOI: 10.1371/journal.pone.0227592)
		FANCC	Genome-Scale CRISPR KO (GeCKO) library	Moder et al., 2017 (DOI: 10.1038/s41467-017-01439-x)
		genome-wide screen	pLentiCRISPR V2-puro vector	Menasche et al., 2020 (DOI: 10.1126/sciadv.abc3243)
		genome-wide	CRISPR-induced resistance screening	Neggers et al., 2018 (DOI: 10.1038/s41467-017-02349-8)
		86 damage response genes	CRISPR-dependent base editing	Cuella-Martin et al., 2021 (DOI: 10.1016/j.cell.2021.01.041)
		DDX3X	Saturation genome editing	Radford et al., 2022 (DOI: 10.1101/2022.06.10.22276179)
		MSH2	lentiviral plasmid - saturation mutagenesis	Jia et al., 2021 (DOI: 10.1016/j.ajhg.2020.12.003)
	Virology	E3 ubiquitin ligase	plasmid vector delivery	Liu & Moss, 2016 (DOI: 10.1128/JVI.00869-16)
		TYK2	custom-made KO	Fuchs et al., 2016 (DOI: 10.1002/eji.201646519)
		DAG1	custom-made KO	Acciani et al., 2017 (DOI: 10.1128/JVI.00574-17)
		PKD1	custom-made KO	Guedán et al., 2017 (DOI: 10.1128/JVI.00217-17)
		B3GAT3, NDST1, GLCE	plasmid vector delivery by electroporation	Tanaka et al., 2017 (DOI: 10.1128/JVI.00432-17)
		eIF2A, eIF2D	custom-made KO	Sanz et al., 2017 (DOI: 10.1038/srep43876)
		VPS51–54	plasmid vector delivery	Realegeno et al., 2017 (DOI: 10.1128/JVI.00011-17)
		c10orf76	custom-made KO	McPhail et al., 2019 (DOI: 10.15252/embr.201948441)
		MeCP2	custom-made KO	Liu et al., 2019 (DOI: 10.1007/s13365-019-00751-0)
		RanBP2	plasmid vector delivery	Shen et al., 2019 (DOI: 10.1101/555896)
		RACK1	plasmid vector delivery	LaFontaine et al., 2019 (DOI: 10.1016/j.virol.2020.03.004)
		TRIM5	custom-made KO	Chiramel et al., 2019 (DOI: 10.1016/j.celrep.2019.05.040)
		ZDHHC5	custom-made KO	Sergeeva & van der Goot, 2019 (DOI: 10.1073/pnas.181258811)
		CMAS, ICAM-5	custom-made KO	Baggen et al., 2019 (DOI: 10.1038/s41467-019-11256-z)
		ACBD3	custom-made KO	Lyoo et al., 2019 (DOI: 10.1128/mBio.02742-18)
		GNPTAB	custom-made KO	Flint et al., 2019 (DOI: 10.1038/s41467-018-08135-4)
		ZDHHC2, ZDHHC8	plasmid vector delivery	Gadalla et al., 2020 (DOI: 10.1042/BCJ20190752)
		TMEM16F, XKR8	custom-made KO	Acciani et al., 2021 (DOI: 10.1128/JVI.01165-21)
		genome-wide	GeCKO lentiviral pooled libraries	Labeau et al., 2020 (DOI: 10.1128/JVI.01751-19)
	Epigenetics	CHD3, SENP1	plasmid vector delivery	Rodríguez-Castañeda et al., 2018 (DOI: 10.1074/jbc.RA118.002844)
		FOXO3	plasmid vector delivery	Grossi et al., 2018 (DOI: 10.1093/nar/gky331)
		FBX025	custom-made KO	Teixeira et al., 2017(DOI: 10.1016/j.abb.2017.04.003)
		HDAC1, HDAC2	plasmid vector delivery	Sawai et al., 2017 (DOI: 10.1074/jbc.M117.803171)
		SENP2	custom-made KO	Garvin et al., 2019 (DOI: 10.1101/gad.321125.118)
		PORCN, WLS	plasmid vector delivery	Tuladhar et al., 2019 (DOI: 10.1074/jbc.RA118.007268)
		BAP1, ASXL1, ASXL2, EZH2	plasmid vector delivery	Campagne et al., 2019 (DOI: 10.1038/s41467-018-08255-x)
		H2A.Z	custom-made KO	Choi et al., 2019 (DOI: 10.1101/553297)
		NSUN6, NSUN2	plasmid vector delivery	Fang et al., 2020 (DOI: 10.15252/msb.202010025)
	Immunology	Suppressor of IKKepsilon	custom-made KO	Sonnenschein et al., 2018 (DOI: 10.1002/2211-5463.12454)
		CD46, CD55, CD59	plasmid vector delivery	Thielen et al., 2018 (DOI: 10.1016/j.jim.2018.02.004)
		ITGA7, ITGB6	plasmid vector delivery	Nixon et al., 2019 (DOI: 10.1038/s41598-018-37462-1)
		TRAF2	custom-made KO	Workman et al., 2020 (DOI: 10.1128/MCB.00429-19)
		MR1	plasmid vector delivery	Kulicke et al., 2022 (DOI: 10.1016/j.jbc.2021.101542)
		STAT1	plasmid vector delivery	Scott et al., 2021 (DOI: 10.1038/s41525-021-00196-7)
		SLFN11, IFNGR1	plasmid vector delivery	Mezzarda et al., 2019 ( DOI: 10.1371/journal.pone.0212053)
	Cell/Molecular Biology	ATF3, ATF4, NOXA	plasmid vector delivery	Núñez-Vázquez et al., 2020 (DOI: 10.1111/febs.15480)
		genome-wide	GeCKO lentiviral pooled libraries	Chidawanyika et al., 2018 ( DOI: 10.1038/s41420-018-0135-5)
		TMEM16	plasmid vector delivery with lipofectamine	Ousingsawat et al., 2018 (DOI: 10.1038/s41419-018-0373-8)
		selenocysteine-tRNA	murine leukaemia virus-like particles	Vindry et al., 2019 (DOI: 10.3390/cells8060574)
		ATG4B	custom-made KO	Agrotis et al., 2019 (DOI: 10.1080/15548627.2019.1569925)
		STAG2	plasmid vector delivery	Bailey et al., 2021 (DOI: 10.26508/lsa.202101083)
		RAD21, SMC2	plasmid vector delivery	Yunusova et al., 2021 (DOI: 10.3389/fmolb.2021.757394)
		long noncoding RNAs	plasmid vector delivery	Yamazaki & Hirose, 2021 (DOI: 10.1007/978-1-0716-1158-6_18)
		OTUD7A	custom-made KO	Garret et al., 2020 (DOI: 10.1111/cge.13709)
		MIIA	plasmid vector delivery	Taneja & Brunette, 2019 (DOI: 10.1091/mbc.E18-11-0752)
		FKRP	custom-made KO	Henriques et al., 2019 (DOI: 10.1002/humu.23827)
		α5 integrin	custom-made KO	Pokharel et al., 2019 (DOI: 10.1038/s41467-019-09453-x)
		UNG1, UNG2	plasmid vector delivery	Sarno et al., 2019 (DOI: 10.1093/nar/gkz145)
		IP3R	custom-made KO	Atakpa et al., 2018 (DOI: 10.1016/j.celrep.2018.11.064)
		FIG4	plasmid vector delivery	Lenk et al., 2019 (DOI: 10.1038/s41598-019-45939-w)
		KDELR1	custom-made KO	Blum et al., 2019 (DOI: 10.1038/s41598-019-47027-5)
		uracil DNA-glycosylase	custom-made KO	Cui et al., 2019 (DOI: 10.1093/nar/gkz183)
		TMBIM5	custom-made KO	Seitaj et al., 2020 (DOI: 10.3390/cells9102147)
		HRI, PERK, GCN2, PKR	custom-made KO	Szwed et al., 2020 (DOI: 10.1186/s12951-019-0567-y)
		LRRC8	custom-made KO	Afzal et al 2019 (DOI: 10.14814/phy2.14303)
		MAOA	custom-made KO	Manca et al., 2018 (DOI: 10.1007/s12031-018-1044-z)
		NEK1	custom-made KO	Martins et al., 2021 (DOI: 10.1093/mutage/geab011)
		FANCD2, FANCA, SLFN11	plasmid vector delivery	Okamoto et al., 2021 (DOI: 10.1182/blood.2019003782)
		MAN2C1	custom-made KO	Maia et al., 2022 (DOI: 10.1016/j.ajhg.2021.12.010)
		TRAF2	custom-made KO	Palumbo et al., 2022 (DOI: 10.1016/j.biocel.2022.106193)
	Metabolism	FASN, ACACA, LDLR, SREBF1, SREBF2	plasmid vector delivery	Aregger et al., 2020 (DOI: 10.1038/s42255-020-0211-z)
		C12orf49	custom-made KO
		AP3D1, PAN2	custom-made KO	Shin et al., 2016 (DOI: 10.1242/dmm.023374)
		β-glucocerebrosidase	custom-made KO	Brown et al., 2021 (DOI: 10.3390/genes12071076)
		ATP5J2	plasmid vector delivery	He et al., 2018 (DOI: 10.1073/pnas.1722086115)
		subunit b, OSCP	custom-made KO	He et al., 2017 (DOI: 10.1073/pnas.1711201114)
		TMEM70	custom-made KO	Sánchez-Caballero et al., 2019 (DOI: 10.1101/697185)
		FAM173A	custom-made KO	Małecki et al., 2019 (DOI: 10.1074/jbc.RA119.009045)
		NRK1	custom-made KO	Yang et al., 2019 (DOI: 10.1074/jbc.RA118.005772)
		SHMT2	custom-made KO	Guiducci et al., 2019 (DOI: 10.1093/nar/gkz129)
		DEGS1, DEGS2	custom-made KO	Karsai et al., 2019 (DOI: 10.1172/JCI124159)
		SLC10A7	custom-made KO	Karakus et al., 2020 (DOI: 10.1038/s41598-020-64006-3)
		TMEM189	custom-made KO	Werner et al., 2020 (DOI: 10.1073/pnas.1917461117)
		FASN, SPRING	plasmid vector delivery	Loregger et al., 2020 (DOI: 10.1038/s41467-020-14811-1)
		INPP4A	custom-made KO	Wang et al., 2020 (DOI: 10.1074/jbc.RA119.011774)
		PDIA3	custom-made KO	Yoo et al., 2019 (DOI: 10.1016/j.neuint.2018.11.002)
		PEDS1	custom-made KO	Werner et al., 2022 (DOI: 10.1007/s00018-022-04238-w)
		TRPM7	plasmid vector delivery	Zhelay et al., 2018 (DOI: 10.1074/jbc.RA118.004066)
		PLPP1-3	plasmid vector delivery	Goto et al., 2021 (DOI: 10.1016/j.jbc.2021.100605)
	Drug Validation	GPx1	custom-made KO	Behnisch-Cornwell et al., 2020 (DOI: 10.3390/antiox9121300)
		GSK-3β	custom-made KO	Kauffman et al., 2020 (DOI: 10.1016/j.leukres.2020.106464)
		ZIP8	custom-made KO	Geng et al, 2019 (DOI: 10.1016/j.taap.2018.10.016)
		HDAC6	custom-made KO	Depetter et al., 2019 (DOI: 10.1002/ijc.32169)
		PARP1	custom-made KO	Hopkins et al., 2019 (DOI: 10.1158/1541-7786.MCR-18-0138)
		RNF43, PWWP2B	custom-made KO	Sohn et al., 2021 (DOI: 10.7150/jca.56014)
		ENT1, ENT2	custom-made K.O.	Jouan et al., 2021 (DOI: 10.1007/s13318-021-00703-2)
		XRCC4, XLF, PAXX, DNA‐PKcs, DNA‐PKcs/PAXX, DNA‐PKcs/XRCC4, LIG4, H2AX	custom-made KO	Xing & Oksenych et al., 2019 (DOI: 10.1002/2211-5463.12681)
	Proteomics	UPS and 41 other genes	lentiGuide-Puro plasmid for sgRNA	Hundley and Toczyski, 2021 (DOI: 10.1016/j.xpro.2021.100685)
	Functional Genomics	136 genes	custom-made KO	Smits et al., 2019 (DOI: 10.1038/s41592-019-0614-5)
	Supplementary Table 1. Summary table of the genes studied using HAP1 since its establishment.
